# Supplementary material
Source: publisher site journal article supplement (https://www.dovepress.com/article/387681)
Supplement: Supplementary file 1 [file get_supplementary_file.php]

**Comparative colloidal stability of commercial amphotericin B nanoformulations using dynamic and static multiple light scattering techniques**

Jun Yea,b, Renjie Lia,b, Jialing Chenga,b, Dongdong Liua,b, Yanfang Yanga,b, Hongliang Wanga,b, Xiaoyan Xua,b, Lin Lia,b, Panpan Mac, and Yuling Liua,b*

aState Key Laboratory of Bioactive Substance and Function of Natural Medicines, Institute of Materia Medica, Chinese Academy of Medical Sciences & Peking Union Medical College, Beijing 100050, P.R. China

bBeijing Key Laboratory of Drug Delivery Technology and Novel Formulation, Institute of Materia Medica, Chinese Academy of Medical Sciences & Peking Union Medical College, Beijing 100050, P.R. China

cBeijing Union Second Pharmaceutical Factory, Beijing 100060, P.R. China

Correspondence: Professor Yuling Liu, State Key Laboratory of Bioactive Substance and Function of Natural Medicines, Institute of Materia Medica, Chinese Academy of Medical Sciences & Peking Union Medical College, 1 Xiannongtan Street, Beijing 100050, P.R. China, Tel (86)10-89285188, Fax (86)10-89285190, Email [ylliu@imm.ac.cn](mailto:ylliu@imm.ac.cn).


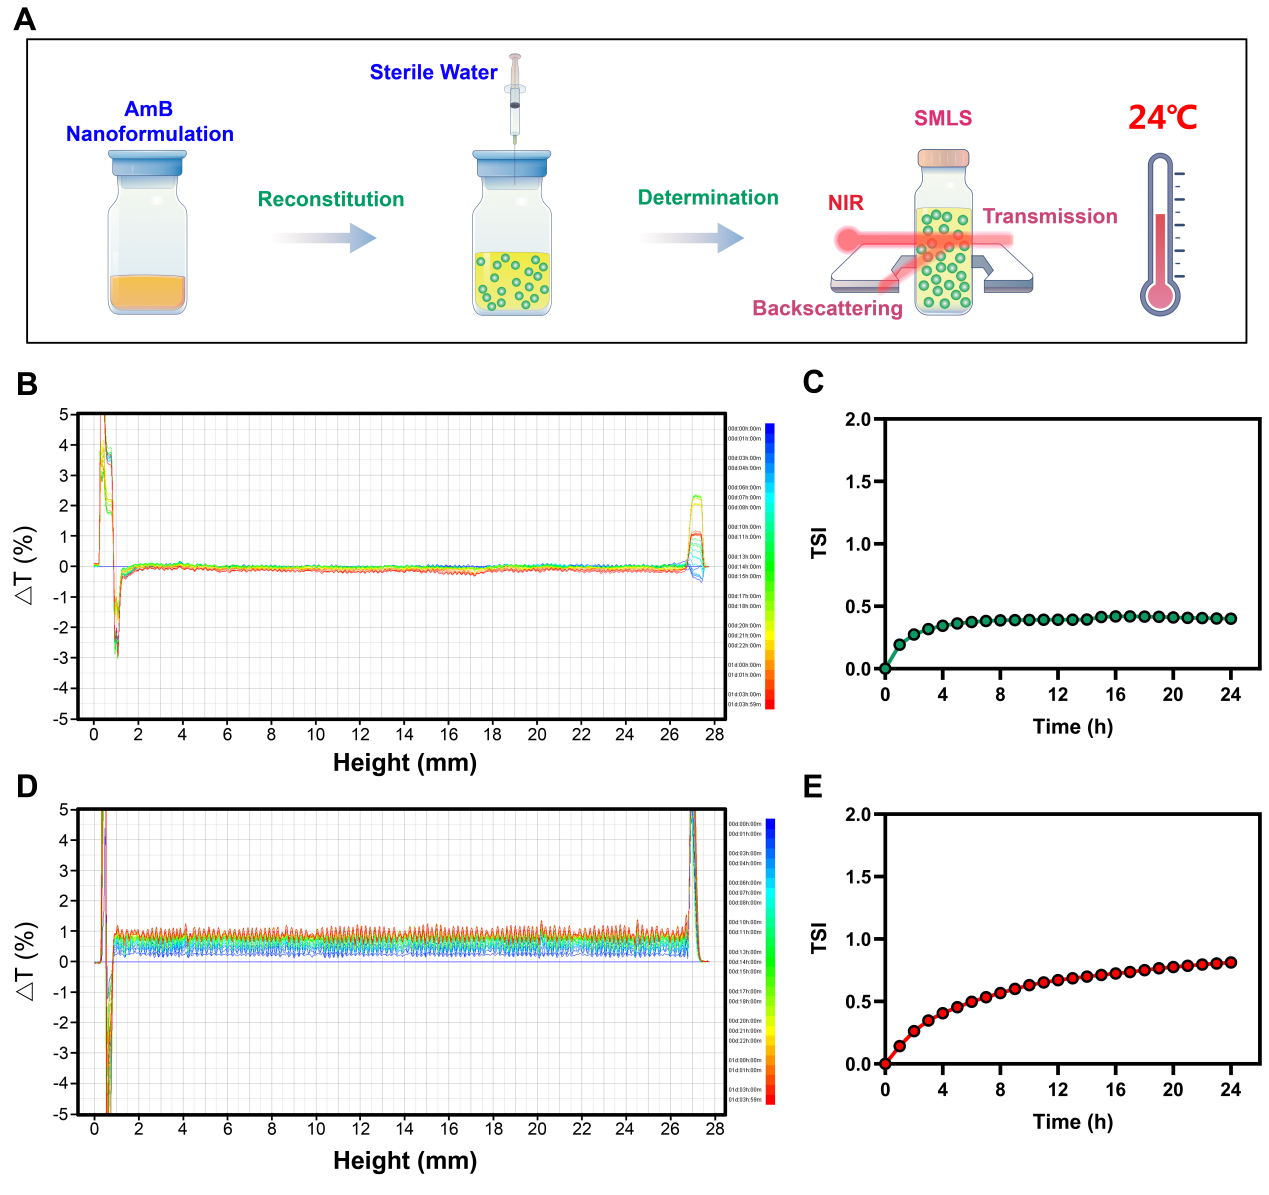
**Figure S1** In vitro colloidal stability of the concentrated AmB nanodispersions. (A) Schematic illustration of the measurement process. Variations of transmission profiles (ΔT) and TSI of AmB-CSC (B and C) and AmB-Lipo (D and E) reconstituted in sterile water at 24°C for 24 h.
